# Supplementary material for: Engineering mice for female-biased progeny without impacting genetic integrity and litter size
Source: Research Square preprint supplement (doi:10.21203/rs.3.rs-6592673/v1), 2025-05-16
Supplement: Supplementary file 1 [file b66d57b32d803129872999ad.xlsx]

## Sheet: Intro
For transparency, we have included a summary of the F₁ matings in the appendix. The mice used in those experiments were not produced under appropriate doxycycline conditions, as the antibiotic was not adequately dissolved. This may have resulted in suboptimal gene regulation, reduced fertility, and a lower sample yield. To ensure accurate and reproducible results, we repeated the experiments usin…

## Sheet: F0 breedings
	Clone	positive F0 male	Chimeric rate	WT female	Breeding date	F1 DOB	Number of F1 mice	Number of positive F1 mice	Male No.	F1 mouse abnormal records
TKIE100-t	1E3	F0-5#,2022-03-06,(KI/KI);	100	C57BL/6N,2022-4-19,WT;	2022-05-31	2022-07-23	6	1	1#	2022-08-12: 1#
TKIE100-t	1E3	F0-5#,2022-03-06,(KI/KI);	100	C57BL/6N,2022-4-19,WT;	2022-05-31	2022-08-24	6	0
The 1st experiment was started on August 9th, 2022

## Sheet: F1 Breeding
F2 Breeding
Group	Male ID	WT Female	Breeding pair nr.	2023-09-16	2023-09-20	2023-09-24	2023-09-28	2023-10-03	2023-10-07	2023-10-11	2023-10-15	2023-10-19	2023-10-23	2023-10-27	2023-10-31
A Dox 2mg/ml	76	B6N	1		1√			1√						1√	1√
	79	B6N	2			1
	64	B6N	3	1			1					1√	1√
	34	B6N	4		1	1
	24	B6N	5		1					1√			1√
B No treatment	68	B6N	12	1				1√
	78	B6N	13
	25	B6N	14
	35	B6N	15	1						1√
	81	B6N	16
	18	B6N	17
C No treatment	1	B6N	18							1√
	2	B6N	19	1				1√				1√		1√
	3	B6N	20		1√		1	1√
	4	B6N	21	1					1		1√
	5	B6N	22	2				1√
	6	B6N	23	1
Note: F2 breeding start on 2023/9/13. Detect copulatory plug every 3 days, record pregnancy once a week. Breeding pairs have one plug write 1, two plug write 2, pregnancy write ✔

## Sheet: F2 Sex validated by PCR
Clone	F1 ♂ ID	WT ♀	F1/2 DOB	1 or 2 births	Total pups	♂ males	♀ females	positive ♂ males	positive ♀ females
1E3	F0#5	B6N	23/7/2022	2	12	1	11	1	0
1E3	76#	B6N	2023-10-06	2	14	6	8	6	0
1E3	64#	B6N	2023-10-06	1	4	1	3	1	0
1E3	68#	B6N	2023-10-28	1	5	1	4	1	0
1E3	64#	B6N	2023-11-02	1	9	3	6	3	0
1E3	64#	B6N	2023-11-05	1	4	3	1	3	0
1E3	76#	B6N	2023-11-05	1	9	3	6	3	0
1E3	76#	B6N	2023-11-11	1	9	5	4	5	0
1G2	35#	B6N	2023-10-23	1	6	2	4	2	0
1G2	35#	B6N	2023-11-11	1	6	2	4	2	0
WT	2#	B6N	2023-10-06	1	8	3	5
WT	2#	B6N	2023-10-09	1	3	2	1
WT	3#	B6N	2023-10-12	2	9	5	4
WT	2#	B6N	2023-10-27	1	10	5	5
WT	2#	B6N	2023-10-31	2	12	9	3
WT	1#	B6N	2023-11-06	2	11	7	4
WT	5#	B6N	2023-11-06	1	8	4	4
